# Supplementary material
Source: Springer Nature journal article supplement (https://www.springermedizin.de/resource/supplementary/12875_2007_274_MOESM1_ESM.pdf/9436704)
Supplement: MOESM1 [file 9436704]

10. How often do you participate in the following further training activities?

|                                                   | every<br>week            | once<br>a<br>month       | every<br>six<br>months   | never                    |
|---------------------------------------------------|--------------------------|--------------------------|--------------------------|--------------------------|
| “GP’s days”                                       | <input type="checkbox"/> | <input type="checkbox"/> | <input type="checkbox"/> | <input type="checkbox"/> |
| training sponsored by a<br>pharmaceutical company | <input type="checkbox"/> | <input type="checkbox"/> | <input type="checkbox"/> | <input type="checkbox"/> |
| CME-group                                         | <input type="checkbox"/> | <input type="checkbox"/> | <input type="checkbox"/> | <input type="checkbox"/> |
| other training .....                              | <input type="checkbox"/> | <input type="checkbox"/> | <input type="checkbox"/> | <input type="checkbox"/> |

11. Do you have undergraduate training in social insurance medicine?

|     |                          |
|-----|--------------------------|
| yes | <input type="checkbox"/> |
| no  | <input type="checkbox"/> |

12. In what form and how often do you participate in discussions on patient related problems

|                                         | every<br>week            | once<br>a<br>month       | every<br>six<br>months   | seldom/<br>never         |
|-----------------------------------------|--------------------------|--------------------------|--------------------------|--------------------------|
| physician’s meetings in<br>the practice | <input type="checkbox"/> | <input type="checkbox"/> | <input type="checkbox"/> | <input type="checkbox"/> |
| Balint group                            | <input type="checkbox"/> | <input type="checkbox"/> | <input type="checkbox"/> | <input type="checkbox"/> |
| CME-group                               | <input type="checkbox"/> | <input type="checkbox"/> | <input type="checkbox"/> | <input type="checkbox"/> |
| meeting with social worker              | <input type="checkbox"/> | <input type="checkbox"/> | <input type="checkbox"/> | <input type="checkbox"/> |
| other discussion .....                  | <input type="checkbox"/> | <input type="checkbox"/> | <input type="checkbox"/> | <input type="checkbox"/> |

13. I have contact with the social insurance office on average

|                  |                          |
|------------------|--------------------------|
| every week       | <input type="checkbox"/> |
| every month      | <input type="checkbox"/> |
| every six months | <input type="checkbox"/> |
| never            | <input type="checkbox"/> |

14. My contacts with the social insurance office are

|                                                     |                          |
|-----------------------------------------------------|--------------------------|
| in writing                                          | <input type="checkbox"/> |
| by telephone                                        | <input type="checkbox"/> |
| mini-rehabilitation meeting                         | <input type="checkbox"/> |
| other rehabilitation meeting                        | <input type="checkbox"/> |
| physicians’ meetings with social insurance officers | <input type="checkbox"/> |
| other contact .....                                 | <input type="checkbox"/> |

**Consider the following statements.** *(Mark your opinion by a cross on the scale)*  
(SIO = Social Insurance Office)

15. At present, the function of the SIO is to assist the sick person in returning to work as quickly as possible.

Disagree | \_\_\_\_\_ | Agree

16. The SIO's participation in rehabilitation work is mainly formal.

Disagree | \_\_\_\_\_ | Agree

17. The SIO's participation is an asset in rehabilitation work.

Disagree | \_\_\_\_\_ | Agree

18. The physician has the greatest influence on rehabilitation work.

Disagree | \_\_\_\_\_ | Agree

19. The SIO has the greatest influence on rehabilitation work.

Disagree | \_\_\_\_\_ | Agree

20. The employer has the greatest influence on rehabilitation work.

Disagree | \_\_\_\_\_ | Agree

21. The patient has the greatest influence on rehabilitation work.

Disagree | \_\_\_\_\_ | Agree

22. Patient, physician, SIO and employer can find a shared goal for the rehabilitation work through discussions.

Disagree | \_\_\_\_\_ | Agree

23. SIO officers have good knowledge of work in various occupations.

Disagree | \_\_\_\_\_ | Agree

24. The SIO's regulations are an obstacle to rehabilitation work.

Disagree | \_\_\_\_\_ | Agree

25. The SIO's regulations are an asset in rehabilitation work.

Disagree | \_\_\_\_\_ | Agree

26. It is a good thing that social insurance officers make home visits to ensure that there is no cheating with sickness certification.  
Disagree | \_\_\_\_\_ | Agree
27. The SIO's advising physicians see to the best interests of the patient.  
Disagree | \_\_\_\_\_ | Agree
28. The SIO's advising physicians act on the basis of overly detailed regulations.  
Disagree | \_\_\_\_\_ | Agree
29. Personal problems and worries may influence the pain a patient has from a shoulder complaint.  
Disagree | \_\_\_\_\_ | Agree
30. Patients should be allowed to be on sick leave when they are tired and depressed.  
Disagree | \_\_\_\_\_ | Agree
31. Many people report sick without being ill.  
Disagree | \_\_\_\_\_ | Agree
32. Many people are on long-term sick leave without being ill.  
Disagree | \_\_\_\_\_ | Agree
33. If a person gets on well at his/her job, he/she will want to be on sick leave for as short a time as possible.  
Disagree | \_\_\_\_\_ | Agree
34. Sick leave benefits encourage unnecessary sick listing.  
Disagree | \_\_\_\_\_ | Agree
35. If a patient asks to be sick listed, the physician has no choice but to sick list him/her.  
Disagree | \_\_\_\_\_ | Agree
36. A physician's work situation affects his/her sick listing practices.  
Disagree | \_\_\_\_\_ | Agree
37. Physicians have good knowledge of work in various occupations.  
Disagree | \_\_\_\_\_ | Agree

38. The physician's decision on sick listing is sometimes in conflict with the patient's opinion.  
Disagree | \_\_\_\_\_ | Agree
39. I sometimes sick list a patient even when it is not medically justified.  
Disagree | \_\_\_\_\_ | Agree
40. I sometimes sick list a patient for social reasons.  
Disagree | \_\_\_\_\_ | Agree
41. The social insurance system does not encourage job seeking.  
Disagree | \_\_\_\_\_ | Agree
42. Today's social insurance system is good.  
Disagree | \_\_\_\_\_ | Agree
43. Most employers are eager to have employees with a disease or a handicap at the workplace.  
Disagree | \_\_\_\_\_ | Agree
44. Most employers have a positive attitude towards part time sick leave.  
Disagree | \_\_\_\_\_ | Agree
45. Being unemployed for a long time is harmful to one's health.  
Disagree | \_\_\_\_\_ | Agree
46. Being on sick leave for a long time is harmful to one's health.  
Disagree | \_\_\_\_\_ | Agree
47. My general health is good.  
Disagree | \_\_\_\_\_ | Agree
48. I get on well at my job.  
Disagree | \_\_\_\_\_ | Agree
49. My knowledge of the Social Insurance System is insufficient.  
Disagree | \_\_\_\_\_ | Agree

50. The number of patients on my list in 1995 was .....  
(last known data)

51. At this surgery our staff of physicians is

|                |                          |
|----------------|--------------------------|
| much too large | <input type="checkbox"/> |
| somewhat large | <input type="checkbox"/> |
| adequate       | <input type="checkbox"/> |
| somewhat small | <input type="checkbox"/> |
| much too small | <input type="checkbox"/> |

52. A this surgery

|                                                                   |                          |
|-------------------------------------------------------------------|--------------------------|
| patients have open access to the surgery                          | <input type="checkbox"/> |
| patients have open telephone access to the<br>physician every day | <input type="checkbox"/> |
| appointments are mostly planned directly by<br>the physician      | <input type="checkbox"/> |
| appointments are mostly planned by the nurse                      | <input type="checkbox"/> |
| appointments are mostly planned in writing                        | <input type="checkbox"/> |

***Thank you for your participation!***
